# Supplementary material for: Targeting fatty acid β-oxidation impairs monocyte differentiation and prolongs heart allograft survival
Source: PubMed Central journal article supplement (PMC9057610; doi:10.1172/jci.insight.151596), 2022-04-08
Supplement: jciinsight-7-151596-s196.pdf [file jciinsight-7-151596-s196.pdf]

## SUPPLEMENTAL FIGURES AND FIGURE LEGENDS

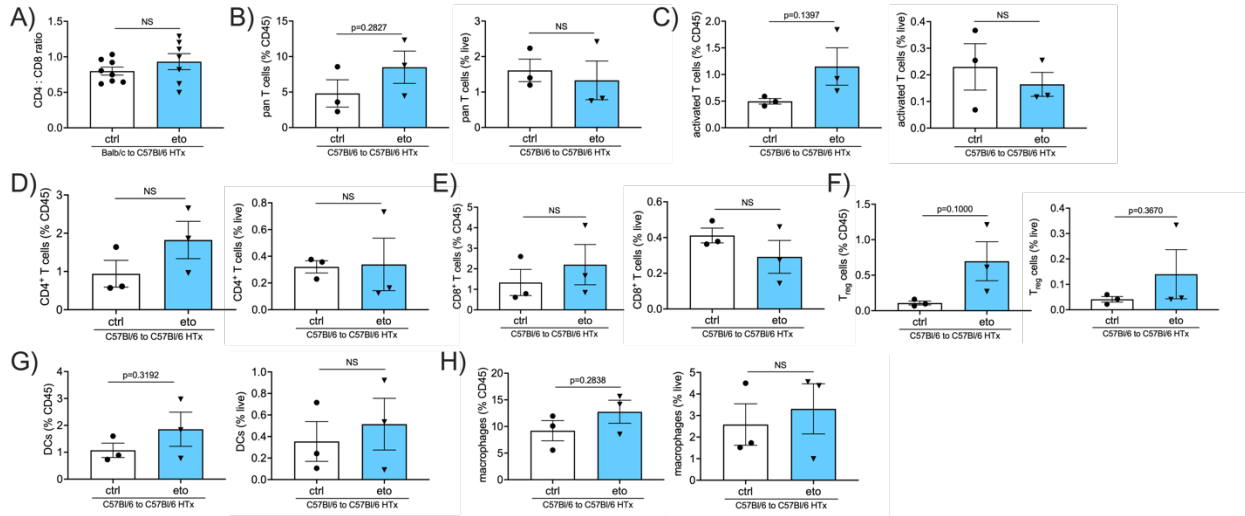

**SUPPLEMENTAL FIGURE 1: CD4:CD8 T CELL RATIO IN HTX ALLOGRAFTS AND IMMUNE CELL PROFILE IN HTX SYNGRAFTS. A-H)** Flow cytometric assessment in transplanted hearts from Balb → B6 heart allografts at 4 days post-transplant shown as a percentage of CD45<sup>+</sup> cells (left graph) or live cells (right graph). **A)** CD4<sup>+</sup> to CD8<sup>+</sup> T cell ratio from Balb → B6 heart allografts at 4 days post-transplant treated with vehicle (ctrl) or etomoxir (eto) (ctrl, n=8; eto, n=7). **B-H)** Flow cytometric assessment in transplanted hearts from B6 → B6 heart allografts at 4 days post-transplant shown as a percentage of CD45<sup>+</sup> cells. **B)** Pan T cells assessed by CD3<sup>+</sup>CD90.2<sup>+</sup> cells (ctrl, n=3; eto, n=3). **C)** Activated T cells assessed by CD69<sup>+</sup>CD3<sup>+</sup>CD90.2<sup>+</sup> cells (ctrl, n=3; eto, n=3). **D)** CD4<sup>+</sup> T cells assessed by CD4<sup>+</sup>CD3<sup>+</sup>CD90.2<sup>+</sup> cells (ctrl, n=3; eto, n=3). **E)** CD8<sup>+</sup> T cells assessed by CD8<sup>+</sup>CD3<sup>+</sup>CD90.2<sup>+</sup> cells (ctrl, n=3; eto, n=3). **F)** T regulatory cells assessed by Foxp3<sup>+</sup>CD4<sup>+</sup>CD3<sup>+</sup>CD90.2<sup>+</sup> cells (ctrl, n=3; eto, n=3). **G)** Dendritic cells (DCs) assessed by CD11c<sup>+</sup>MHCII<sup>+</sup>CD64<sup>-</sup> cells (ctrl, n=3; eto, n=3). **H)** Macrophages assessed by CD11b<sup>+</sup>CD64<sup>+</sup>CD24<sup>-</sup> cells (ctrl, n=3; eto, n=3). Data are represented as mean ± SEM. NS, not statistically significant by *t*-test.

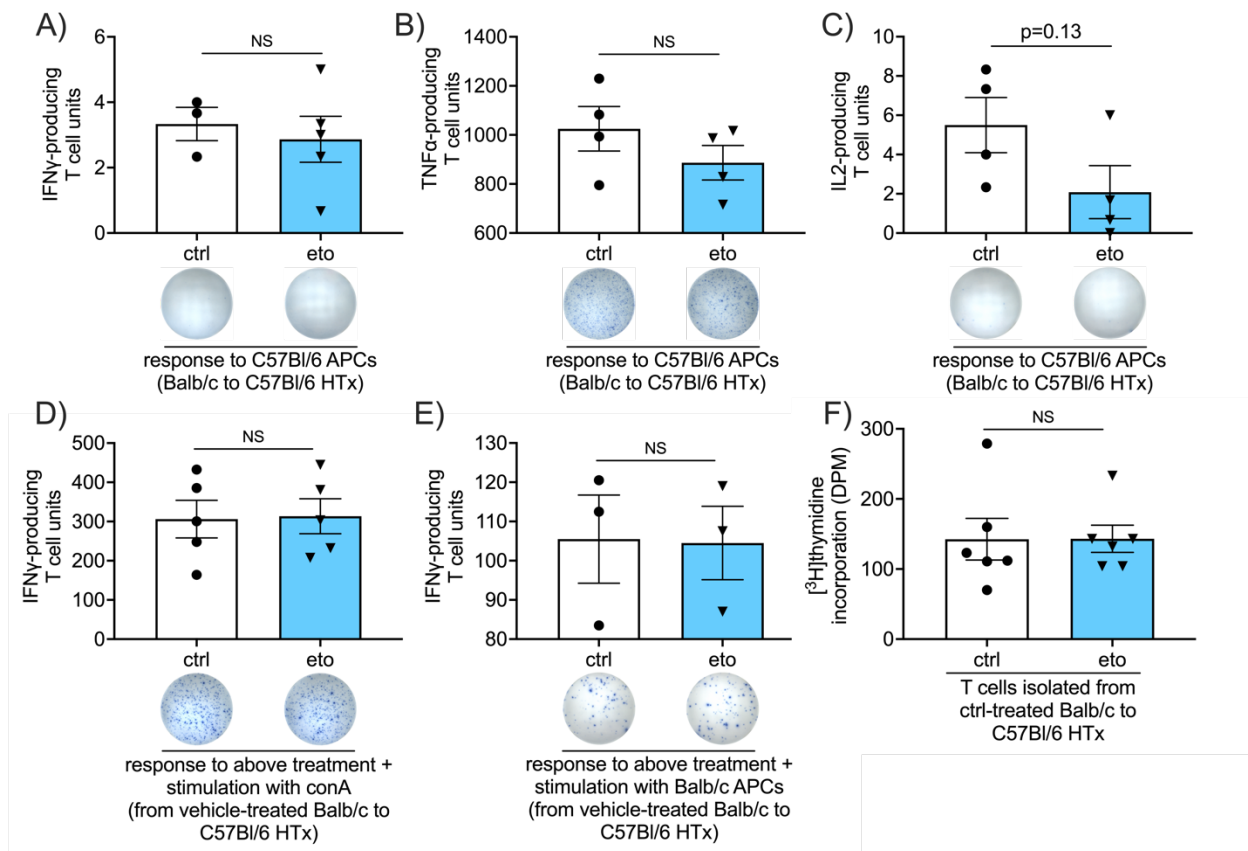

**SUPPLEMENTAL FIGURE 2: T CELL ACTIVATION IN RESPONSE TO B6 APCs, DIRECT EFFECT OF FAO INHIBITION ON T CELL ACTIVATION AND EFFECT OF FAO INHIBITION ON T CELL PROLIFERATION. A-C)** ELISPOT assay performed using splenocytes procured at 4d post-transplantation from Balb  $\rightarrow$  B6 heart allografts from either vehicle (ctrl) or etomoxir (eto)-treated animals. Samples were stimulated with activated B6 APCs and assessed for the production of IFN $\gamma$  (ctrl, n=6; eto, n=8) (**A**), TNF $\alpha$  (ctrl, n=4; eto, n=4) (**B**) or IL2 (ctrl, n=4; eto, n=4) (**C**). **D,E)** ELISPOT assay performed using splenocytes procured at 4d post-transplantation from Balb  $\rightarrow$  B6 heart allografts from ctrl-treated HTx and incubated in the presence or absence of eto. **D)** IFN $\gamma$  production in response to positive control stimulus (concanavalin A (conA)) (ctrl, n=3; eto, n=3). **E)** IFN $\gamma$  production in response to allostimulus (Balb APCs) (ctrl, n=3; eto, n=3). **F)** Proliferation of T cells isolated from spleens from ctrl-treated Balb  $\rightarrow$  B6 HTx recipients in response to treatment with ctrl or eto for 24h, as assessed by [ $^3\text{H}$ ]thymidine incorporation (ctrl, n=6; eto, n=6). Data are represented as mean  $\pm$  SEM. NS, not statistically significant by *t*-test.

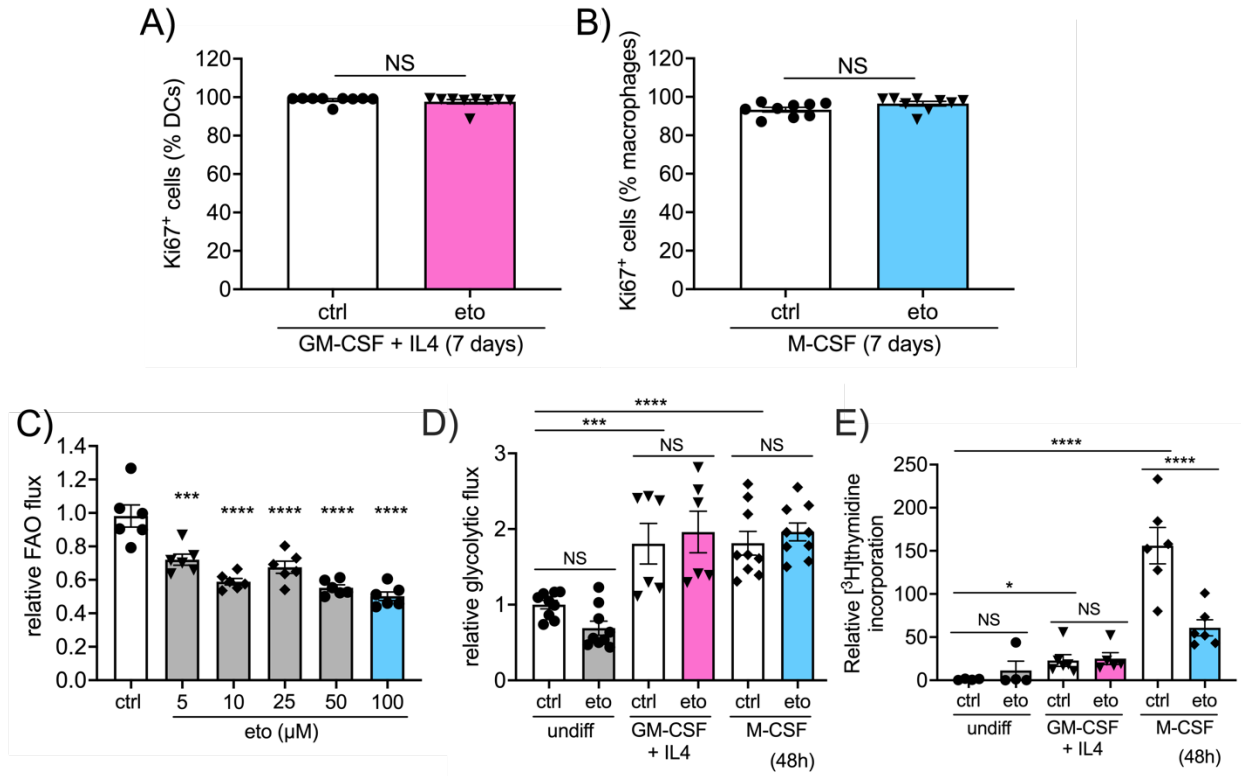

**SUPPLEMENTAL FIGURE 3: ASSESSMENT OF FAO INHIBITION ON PROLIFERATION AND GLYCOLYTIC FLUX FROM IN VITRO MONOCYTE DIFFERENTIATION. A-F)** Data from in vitro differentiation of bone marrow-derived monocytes stimulated towards DC (GM-CSF + IL4) or macrophage (M-CSF) lineages. **A,B)** Flow cytometric assessment of cells after 7 days culture. **A)** Proliferating DCs as assessed by Ki67 as a percentage of CD11c<sup>+</sup>MHCII<sup>+</sup>CD64<sup>-</sup> cells (ctrl, n=9; eto, n=9). **B)** Proliferating macrophages assessed by Ki67 as a percentage of CD11b<sup>+</sup>CD64<sup>+</sup>CD24<sup>-</sup> cells (ctrl, n=9; eto, n=9). **C)** FAO flux in monocytes treated with 5, 10, 25, 50 or 100 μM etomoxir for 24h in basal media, as assessed by 9,10-<sup>3</sup>H]palmitic acid radioisotope incorporation (n=6). **D)** Glycolytic flux in monocytes in media only, or treated for 48h with GM-CSF + IL4 or M-CSF, as assessed by [5-<sup>3</sup>H]glucose radioisotopic incorporation (ctrl, n=6; eto, n=6). **E)** Proliferation of monocytes in media only, or treated for 48h with GM-CSF + IL4 or M-CSF, as assessed by [<sup>3</sup>H]thymidine incorporation (ctrl, n=6; eto, n=6). Data are represented as mean of individual data points from at 3 independent experiments ± SEM. NS, not statistically significant; \*p<0.05; \*\*\*p<0.001; \*\*\*\*p<0.0001; NS, not statistically significant, by *t*-test (**A,B**) or ANOVA and Bonferroni post-hoc test (**C-E**).



**SUPPLEMENTAL FIGURE 4: ASSESSMENT OF CD45.1+ MONOCYTES AND MONOCYTE, DC AND MACROPHAGE PROLIFERATION IN ADOPTIVE TRANSFER EXPERIMENTS. A-J)** Flow cytometric assessment of transplanted hearts at 4 days post-HTx from Balb → B6 HTx adoptively transferred with CD45.1+ monocytes. **A,B)** Assessment of proliferation by percentage Ki67 incorporation. **A)** In CD11c+MHCII+CD64- dendritic cells (DCs) as a percentage of CD45.1+ cells (ctrl, n=4; eto, n=5). **B)** In CD11b+CD64+CD24- macrophages as a percentage of CD45.1+ (ctrl, n=4; eto, n=5). **C)** CD45.1+ cells as a percentage of CD45+ cells in the transplanted heart (Tx heart), native heart (Na heart), spleen and mediastinal lymph node (med LN) (ctrl, n=4; eto, n=5). **D)** CD11c+MHCII+CD64- dendritic cells (DCs) as a percentage of CD45.1+ cells in the Tx heart, Na heart, spleen and med LN (ctrl, n=4; eto, n=5). **E)** CD11b+CD64+CD24- macrophages as a percentage of CD45.1+ cells in the Tx heart, Na heart, spleen and med LN (ctrl, n=4; eto, n=5). **F)** CD45.2+ DCs assessed by CD11c+MHCII+CD64- cells (ctrl, n=4; eto, n=5). **G)** CD45.2+ macrophages assessed by CD11b+CD64+CD24- cells (ctrl, n=4; eto, n=5). Data are represented as mean ± SEM. NS, not statistically significant; \* $p < 0.05$ ; NS, not statistically significant, by *t*-test (**A,B, F,G**) or ANOVA and Bonferroni post-hoc test (**C-E**).

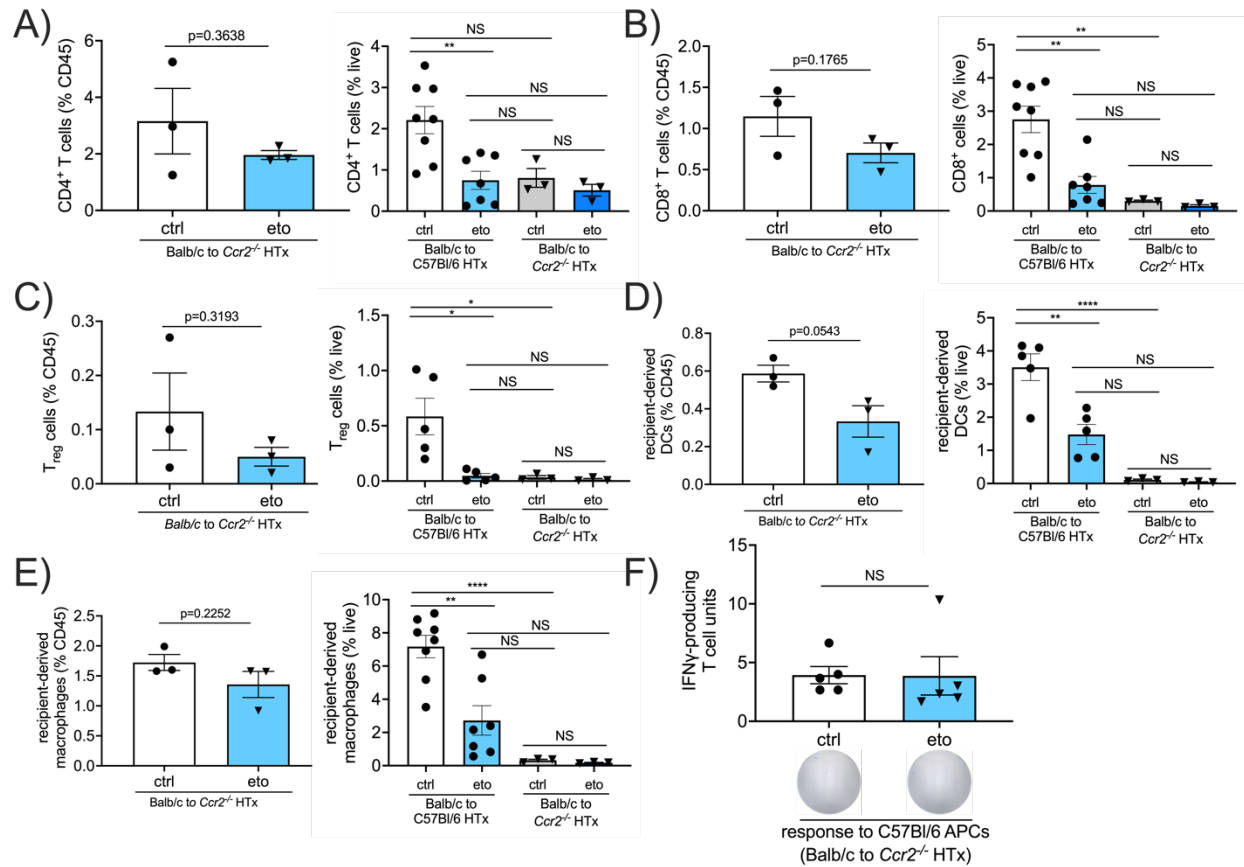

**SUPPLEMENTAL FIGURE 5: FLOW CYTOMETRY FOR T CELLS IN *Ccr2*<sup>-/-</sup> HTx. A-E)** Flow cytometric assessment in transplanted hearts from Balb  $\rightarrow$  *Ccr2*<sup>-/-</sup> heart allografts at 4 days post-transplant shown as a percentage of CD45<sup>+</sup> cells (left graph) or live cells (right graph; data for live cells from Balb  $\rightarrow$  B6 HTx is re-plotted from Figs. 1 and 2). **A)** CD4 T cells assessed by CD4<sup>+</sup>CD3<sup>+</sup>CD90.2<sup>+</sup> cells (ctrl, n=8; eto=7 for Balb  $\rightarrow$  B6 HTx; ctrl, n=3; eto, n=3 for Balb  $\rightarrow$  B6 *Ccr2*<sup>-/-</sup> HTx). **B)** CD8 T cells assessed by CD8<sup>+</sup>CD3<sup>+</sup>CD90.2<sup>+</sup> cells (ctrl, n=8; eto=7 for Balb  $\rightarrow$  B6 HTx; ctrl, n=3; eto, n=3 for Balb  $\rightarrow$  B6 *Ccr2*<sup>-/-</sup> HTx). **C)** T regulatory cells assessed by Foxp3<sup>+</sup>CD4<sup>+</sup>CD3<sup>+</sup>CD90.2<sup>+</sup> cells (ctrl, n=8; eto=7 for Balb  $\rightarrow$  B6 HTx; ctrl, n=3; eto, n=3 for Balb  $\rightarrow$  B6 *Ccr2*<sup>-/-</sup> HTx). **D)** Recipient-derived dendritic cells assessed by IA-b<sup>+</sup>CD11c<sup>+</sup>MHCII<sup>+</sup>CD64<sup>-</sup> cells (ctrl, n=5; eto=5 for Balb  $\rightarrow$  B6 HTx; ctrl, n=3; eto, n=3 for Balb  $\rightarrow$  B6 *Ccr2*<sup>-/-</sup> HTx). **E)** Recipient-derived macrophages assessed by IA-b<sup>+</sup>CD11b<sup>+</sup>CD64<sup>+</sup>CD24<sup>-</sup> cells (ctrl, n=8; eto=7 for Balb  $\rightarrow$  B6 HTx; ctrl, n=3; eto, n=3 for Balb  $\rightarrow$  B6 *Ccr2*<sup>-/-</sup> HTx). **F)** ELISPOT assay performed using splenocytes procured at 4d post-transplantation from Balb  $\rightarrow$  *Ccr2*<sup>-/-</sup> heart allografts from either vehicle (ctrl) or etomoxir (eto)-treated recipients. Samples were stimulated with activated B6 APCs and assessed for the production of IFN $\gamma$  (ctrl, n=4; eto, n=4). Data are represented as mean  $\pm$  SEM. NS, not statistically significant; \*\* $p$ <0.01; \*\*\* $p$ <0.001; \*\*\*\* $p$ <0.0001 by  $t$ -test (**A-E** left panels; **F**) or ANOVA and Bonferroni post-hoc test (**A-E** right panels).

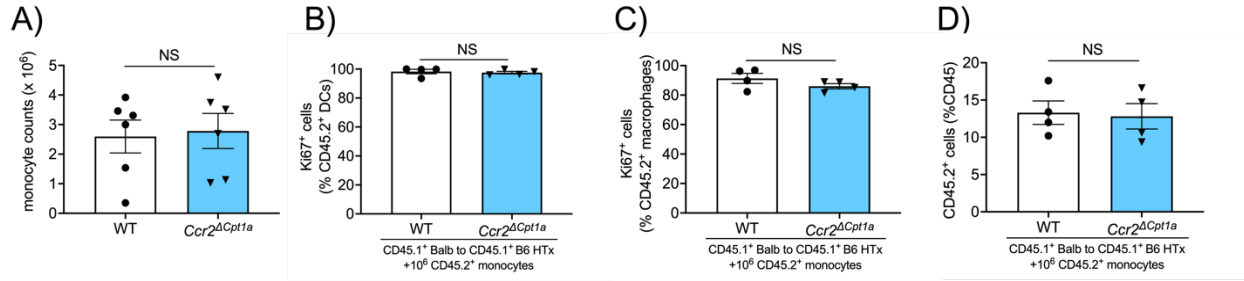

**SUPPLEMENTAL FIGURE 6: GENETIC DELETION OF CPT1A ON PROLIFERATION OF MONOCYTE-DERIVED MACROPHAGES AND MONOCYTE-DERIVED DCs IN HEART ALLOGRAFTS. A)** Cell counts after monocyte isolation from the bone marrow of *Cre-negative;Cpt1a<sup>fl/fl</sup>* (WT; n=6) or *Ccr2.Cre<sup>ER</sup>;Cpt1a<sup>fl/fl</sup>* (*Ccr2*<sup>ΔCpt1a</sup>; n=6) mice. **B-C)** Assessment of proliferation by percentage Ki67 incorporation in CD45.2<sup>+</sup> fraction from transplanted hearts in Balb to B6 CD45.1<sup>+</sup> HTx recipients adoptively transferred with WT or *Ccr2*<sup>ΔCpt1a</sup> monocytes. **B)** In CD11c<sup>+</sup>MHCII<sup>+</sup>CD64<sup>-</sup> dendritic cells (DCs) as a percentage of CD45.2<sup>+</sup> cells (WT, n=4; *Ccr2*<sup>ΔCpt1a</sup>, n=4). **C)** In CD11b<sup>+</sup>CD64<sup>+</sup>CD24<sup>-</sup> macrophages as a percentage of CD45.2<sup>+</sup> (WT, n=4; *Ccr2*<sup>ΔCpt1a</sup>, n=4). **D)** In CD45.2<sup>+</sup> cells as a percentage of CD45<sup>+</sup> cells (WT, n=4; *Ccr2*<sup>ΔCpt1a</sup>, n=4). Data are represented as mean ± SEM. \**p*<0.05; NS, not statistically significant, by *t*-test.

SUPPLEMENTAL TABLE

| antibody               | clone       | company                         |
|------------------------|-------------|---------------------------------|
| CD11b                  | M1/70       | eBioscience (San Diego, CA)     |
| CD3 $\epsilon$         | 17A2        | eBioscience                     |
| CD4                    | GK1.5       | eBioscience                     |
| CD45R (B220)           | RA3-6B2     | eBioscience                     |
| CD64                   | X54-5/7.1   | eBioscience                     |
| CD90.2 (Thy-1.2)       | 30-12       | eBioscience                     |
| Ki-67                  | SolA15      | eBioscience                     |
| Ly-6G                  | 1A8         | eBioscience                     |
| MHC class II (I-A/I-E) | 114.15.2    | eBioscience                     |
| NK1.1                  | PK136       | eBioscience                     |
| CD11b                  | M1/70       | BD Biosciences (San Jose, CA)   |
| CD11c                  | N418        | BD Biosciences                  |
| CD11c                  | HL3         | BD Biosciences                  |
| CD115                  | T38-320     | BD Biosciences                  |
| CD24                   | M1/69       | BD Biosciences                  |
| CD3 $\epsilon$         | 145-2C11    | BD Biosciences                  |
| CD45                   | 30-F11      | BD Biosciences                  |
| CD45.1                 | A20         | BD Biosciences                  |
| CD45.2                 | 104         | BD Biosciences                  |
| CD64                   | X54-5/7.1   | BD Biosciences                  |
| CD69                   | H1.2F3      | BD Biosciences                  |
| CD8a                   | 53-6.7      | BD Biosciences                  |
| Foxp3                  | M23         | BD Biosciences                  |
| I-A[b]                 | AF-1201     | BD Biosciences                  |
| Ly-6G                  | 1A8         | BD Biosciences                  |
| MHC class II (I-A/I-E) | M5/114.15.2 | BD Biosciences                  |
| NK1.1                  | PK136       | BD Biosciences                  |
| CD11c                  | N418        | Biolegend (San Diego, CA)       |
| Foxp3                  | FJK-16s     | Thermo Scientific (Waltham, MA) |

**SUPPLEMENTAL TABLE 1. LIST OF ANTIBODIES USED FOR FLOW CYTOMETRY**
